# Supplementary material
Source: PubMed Central journal article supplement (PMC4877443)
Supplement: NIHMS785695-supplement-03.pdf [file NIHMS785695-supplement-03.pdf]

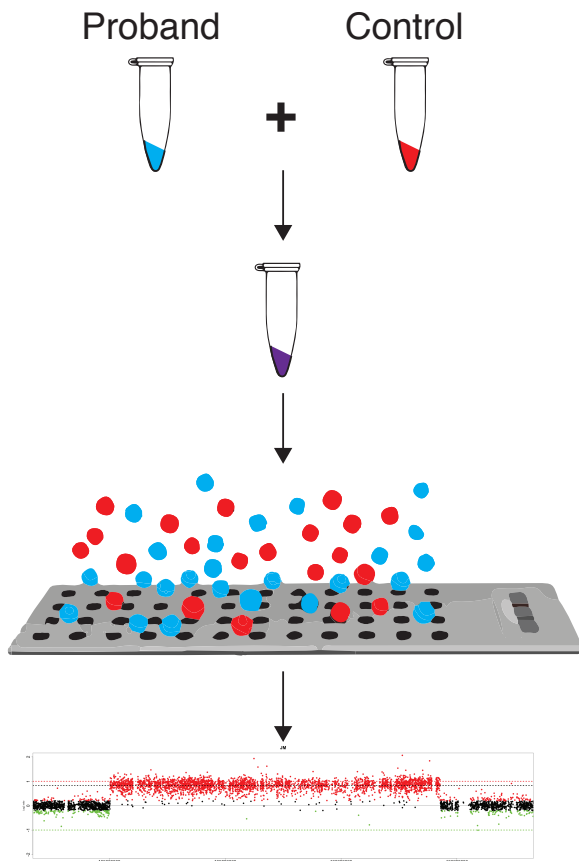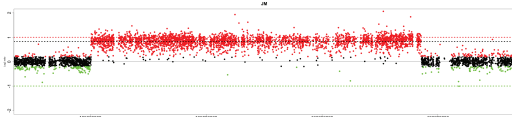

```

TAACATAGTATCATTCAGCCTTCCACCCCAACCCTATT
|||||
TAACATAGTATCATTCAGCCTTCCAAAGTGCTGGTATT
|||||
GCGATCCTCCACATTCAGCCTTCCAAAGTGCTGGTATT

```

HD-aCGH

Jct mapping

XLAG dup Jct amplification

ChrX Ctrl amplification

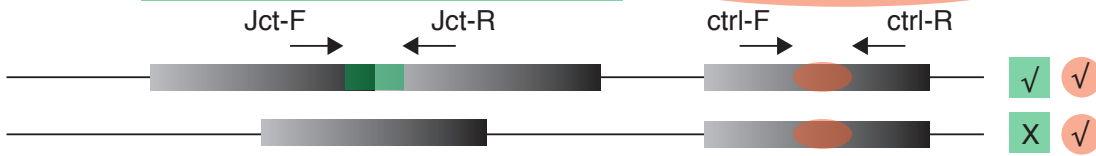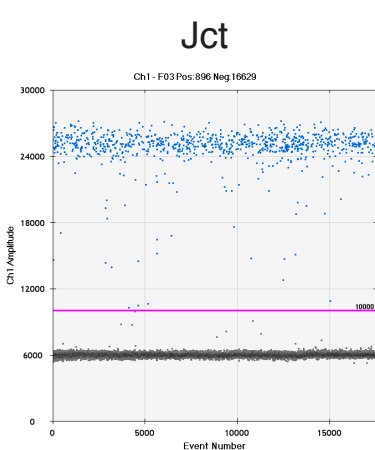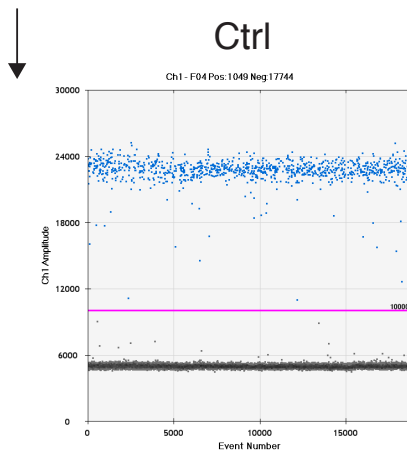

ddPCR

Mosaicism level is quantitated by comparing Jct versus Ctrl.
