# Supplementary material
Source: PubMed Central journal article supplement (PMC4877443)
Supplement: NIHMS785695-supplement-04.pdf [file NIHMS785695-supplement-04.pdf]

**A**

**Male\_constitutional**  
(Mosaicism level = 100%, Jct:Ctrl = N:N)

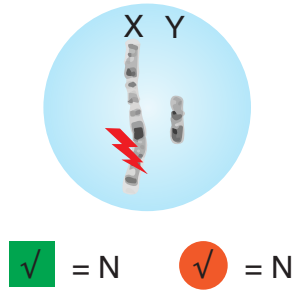

**Male\_mosaic**  
(Mosaicism level =  $M/N$ , Jct:Ctrl =  $M:N$ )

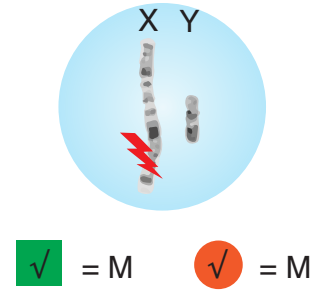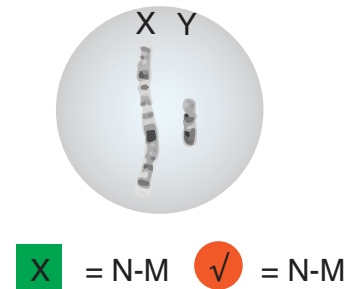**B**

**Female\_constitutional**  
(Mosaicism level = 100%, Jct:Ctrl =  $N:2N$ )

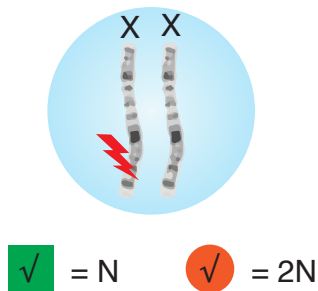

**Female\_mosaic**  
(Mosaicism level =  $M/N$ , Jct:Ctrl =  $M:2N$ )

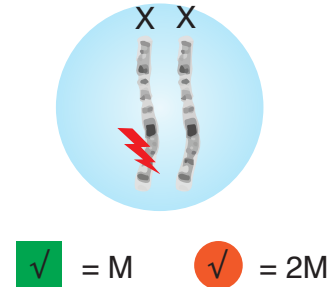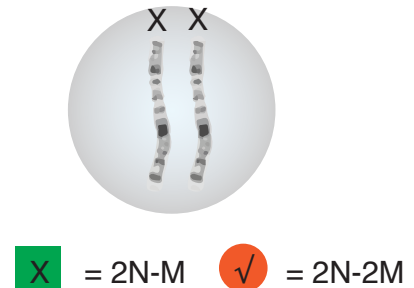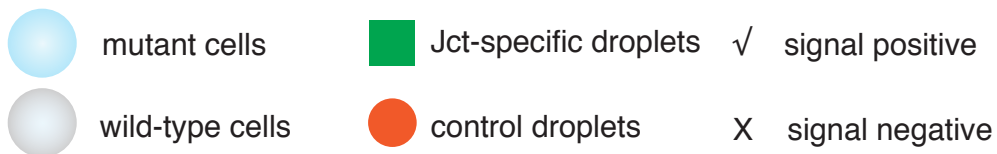

N: number of cells in the entire population  
M: number of cells with mosaic XLAG duplication
