# Supplementary material
Source: PubMed Central journal article supplement (PMC4877443)
Supplement: NIHMS785695-supplement-05.pdf [file NIHMS785695-supplement-05.pdf]

**A**

ChrX:136173873

|      |      |           |                                                                                                       |           |
|------|------|-----------|-------------------------------------------------------------------------------------------------------|-----------|
| PROX | CHRX | 136173831 | TTTGGAGTCACAGGTGGTGGCTTGCCTTAACATAACATAGTATCATTCAGCCTTCCACCCCAACCCCTATTCTTACTCCACCCCCACCCAGGCAGGCTCCA | 136173930 |
| S1   |      | 1         | TTTGGAGTCACAGGTGGTGGCTTGCCTTAACATAACATAGTATCATTCAGCCTTCCAAAGTGTGGTATTACAGGTGTGAACCCACACCCAGCTAGTATT   | 100       |
| DIST | CHRX | 135619931 | CCCAGGCAGGTCTTAGATTCTGACCTCGAGCGATCCTCCACTTCAGCCTTCCAAAGTGTGGTATTACAGGTGTGAACCCACACCCAGCTAGTATT       | 135620030 |

ChrX:135619986

ChrX:136259908

|      |      |           |                                                                                                     |           |
|------|------|-----------|-----------------------------------------------------------------------------------------------------|-----------|
| PROX | CHRX | 136259860 | CAAAGGACAGATGCCAGAGAGAACATGGAGGGGTAACGTAGAGACCAGCAACTGATCGGACATCAGAAGGGGTGCAGAAATGGGAGGGTTTGAAAAT   | 136259959 |
| S11  |      | 1         | CAAAGGACAGATGCCAGAGAGAACATGGAGGGGTAACGTAGAGACCAGCAAGAGGAGTGTCTCAGTGTGCAGGAGAAAAACATGAGAAGGTGAGTTTCT | 100       |
| DIST | CHRX | 135601977 | TTGAGCATTGGAGGTGAGACACAGGAGAAGGGGCCAGAAAAAGAGATCGAAGAGGAGTGTCTCAGTGTGCAGGAGAAAAACATGAGAAGGTGAGTTTCT | 135602076 |

ChrX:135602028

ChrX:136254970

|      |      |           |                                                                                                      |           |
|------|------|-----------|------------------------------------------------------------------------------------------------------|-----------|
| PROX | CHRX | 136254921 | AACCACCTCTTTGCTCTGCTCTTTCATCTAGCTTACAGAGAGTATCTTGTTCATTGCTGTATCTTCATAATTGCCCTCCAGTTGCTTTTCAGATTCTTTC | 136255020 |
| S15  |      | 1         | AACCACCTCTTTGCTCTGCTCTTTCATCTAGCTTACAGAGAGTATCTTGTCCAAGTCCAGTTCATTGGAAAGCCACTACCTCTTCCCTTTCAGAGTATAA | 100       |
| DIST | CHRX | 135596395 | TTCTTCTCAAGTAGTAATAGCTCTGGGCTCTTTGTGAAGCCCTGAGGACCCAAGTCCAGTTCATTGGAAAGCCACTACCTCTTCCCTTTCAGAGTATAA  | 135596494 |

ChrX:135596446

**B**

chrX:136126345

|      |      |           |                                                                                                    |           |
|------|------|-----------|----------------------------------------------------------------------------------------------------|-----------|
| PROX | CHRX | 136126322 | ATTCATGATACAACCACACCTCAAATCCCATAGTGATTTGGCACATATGTTTTCATGGTCCCTTTTTTATTATGTGTGTTTACCATTAAAACTTTTTG | 136126421 |
| S13  |      | 1         | ATTCATGATACAACCACACCTCAAAGTTTGCAAAACCTGTGCTTGTCTCCGGCTCTACCTGGTCCCAGTGTATTATTCATTCAACAAGTAATTACTGA | 100       |
| DIST | CHRX | 135549198 | TAAACTAGAATATGTCCTGGCAGCTAAGCTCAGTCCATTGATCTGTGTGGAGAGCTATATTCATTTTATTTCATTTCATTCACAAGTAATTACTGA   | 135549297 |

chrX:135549274

135554730 CTTGTGCTTGTCTCCGGCTCTACCTGGTCCCAGTGTTT 135554767

\*mutation C>T also exist in the normal CN segment

GTTTGCAAA can be matched to 3 positions at ~20 kb surrounding the breakpoint

- >1 TCCTAGAAGCTGTGTTTGCAAAACCTGAAACAAAATCA 136119567-136119576 (+)
- >2 GTTTGATGGACCTCAGGAAAGGGTGTGTTGCAAAACCTGAATGGGCTTGACCATCCAAAG 135533870-135533861 (-)
- >3 TGTGCGGCATCAAAATACTATTGTTTGCAAAATGTTTGTGAATCTTCCAAGTTAAGCA 135485271-135485262 (-)

chrX:136191776

|      |      |           |                                                                                                       |           |
|------|------|-----------|-------------------------------------------------------------------------------------------------------|-----------|
| PROX | CHRX | 136191725 | AAGAAGGAACCATTTTTGAATTTAGTTTTTATAATTTTCATATATTTGATACATAGGTGTGTATCCTCAAACAATGCATGGTATTGTTGTATAAATGG    | 136191824 |
| S14  |      | 1         | AAGAAGGAACCATTTTTGAATTTAGTTTTTATA-----*---TATTTGATACAGTCTATTTCTAGGAGGGCAGTCAGAATGGTAGCATTTAAAATGAAAG  | 100       |
| DIST | CHRX | 135622242 | TTGCTGCAGTCACCTCCTAATTTGGTCTCATTGCTTCTTCCCTTCCCTCCTTCAGTCTATTTCTAGGAGGGCAGTCAGAATGGTAGCATTTAAAATGAAAG | 135622341 |

\*de novo mutation

chrX:135622296

chrX:136192229

|      |      |           |                                                                                                      |           |
|------|------|-----------|------------------------------------------------------------------------------------------------------|-----------|
| PROX | CHRX | 136192187 | TTCTTTGAGTAAAAATTTGATCACATATGATGAAGGAAATGGGGGCCCATCCCTTATCCAAAGTCCCTAAGTGTCCACTGGTACAAGGTGCTGGGATAGA | 136192286 |
| S10  |      | 1         | TTCTTTGAGTAAAAATTTGATCACATATGATGAAGGAAATGGGGGCCGCAAGGGGTGCTGCAGTAGTCCAGTTGAGAGGTGATGGTTAATAGATGGTTA  | 100       |
| DIST | CHRX | 135601383 | CGCTGAGAGGAGGACAAACAGTGAAGGGCTGGTGGGAAAAGGTGGCCGCAAGGGGTGCTGCAGTAGTCCAGTTGAGAGGTGATGGTTAATAGATGGTTA  | 135601482 |

chrX:135601430

chrX:136123779

|      |      |           |                                                                                                      |           |
|------|------|-----------|------------------------------------------------------------------------------------------------------|-----------|
| PROX | CHRX | 136123733 | TTGCTTGAACGTGGTATTGTTTGGTGGCTGTAGAGATCTTGCCAAAATGCCTCAAATGAGGACTACGAAAAATAGGATTATGTTTCCACATTTAGGC    | 136123832 |
| S16  |      | 1         | TTGCTTGAACGTGGTATTGTTTGGTGGCTGTAGAGATCTTGCCAA (ins) ATACATATATGCACATATATACATATACGAGTATACATGTGTTAACAT | 100       |
| DIST | CHRX | 135533278 | ATACATATATACATATATGCATATATATACATATATACATATATACATATATACATATATACATATATACATATATACATATATACATATATACATAT   | 135533377 |

chrX:135533330

ins: chrX: 136117823-136118113  
 CTGATCATTTCCTAGAGACAGTTCCCGTATAATCACTCACAGTATTATTAATTCCTAGCTTCGTGCTGGCCATGGT  
 ACAGAATCCTGGGTGGCATGCAGCTCAAGCGGTAGTTTGTTCAGACTCAATGATTTTACAATCACCTGGGAGGCAGTGA  
 AGCTGCTAGAAGTGGCCAGAGACAAAGGCCAGTCTTCTTGACCTTCCATTTTATTGTTGGTTGTGACCATGCCGAG  
 ACTGCTAGGTCCAGCAGGGGACCTCTAGACACATGTTAAAGATTGGTGC
