# Supplementary material
Source: PubMed Central journal article supplement (PMC4877443)

### F1B (familial)

JM

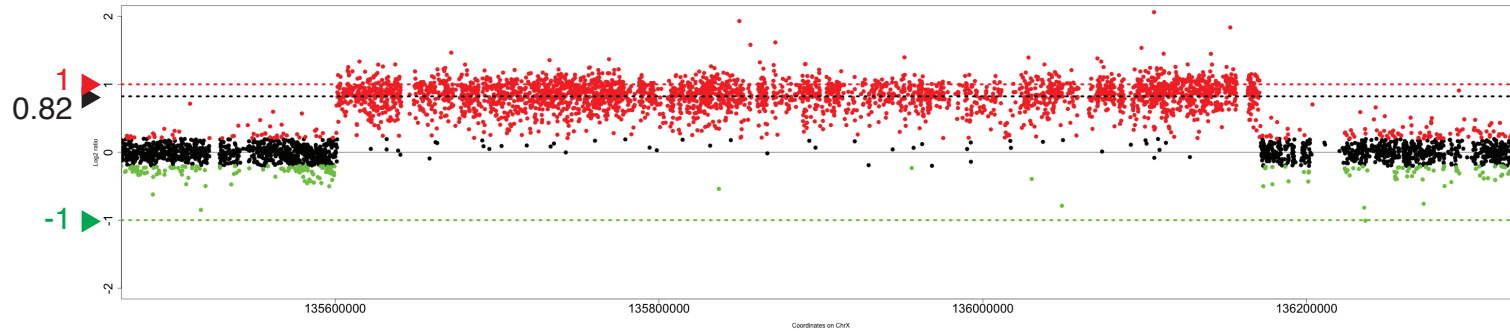

### F1C (familial)

JL

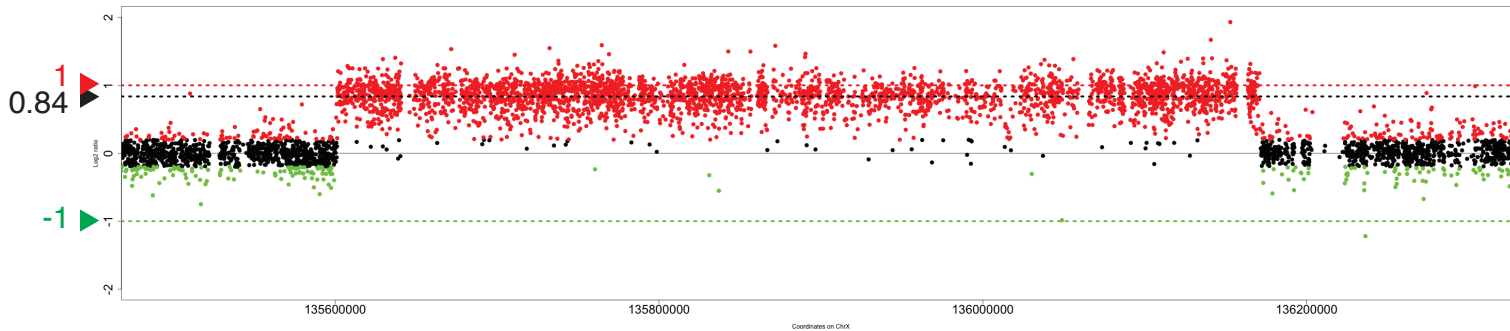

### F2A (familial)

US

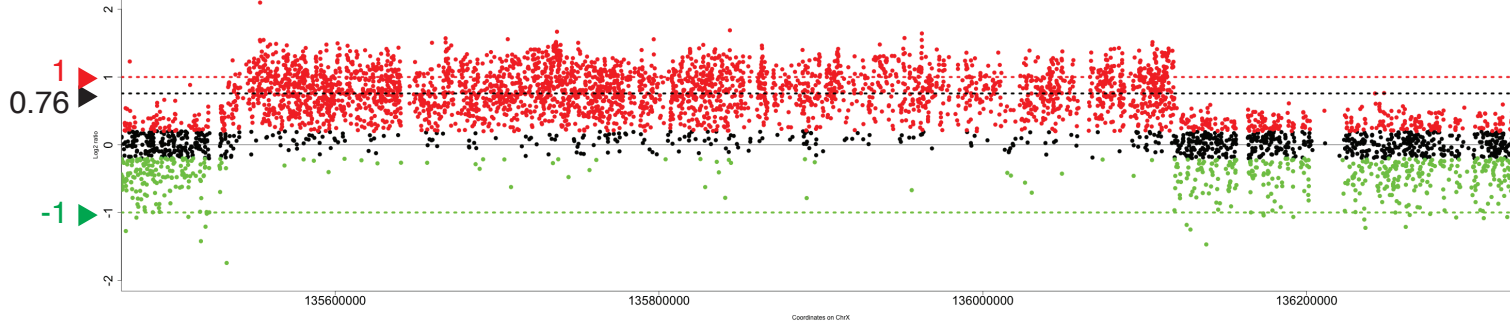

135600000

135800000

136000000

136200000

Coordinates on ChrX

Supplement: NIHMS785695-supplement-06.pdf [file NIHMS785695-supplement-06.pdf]

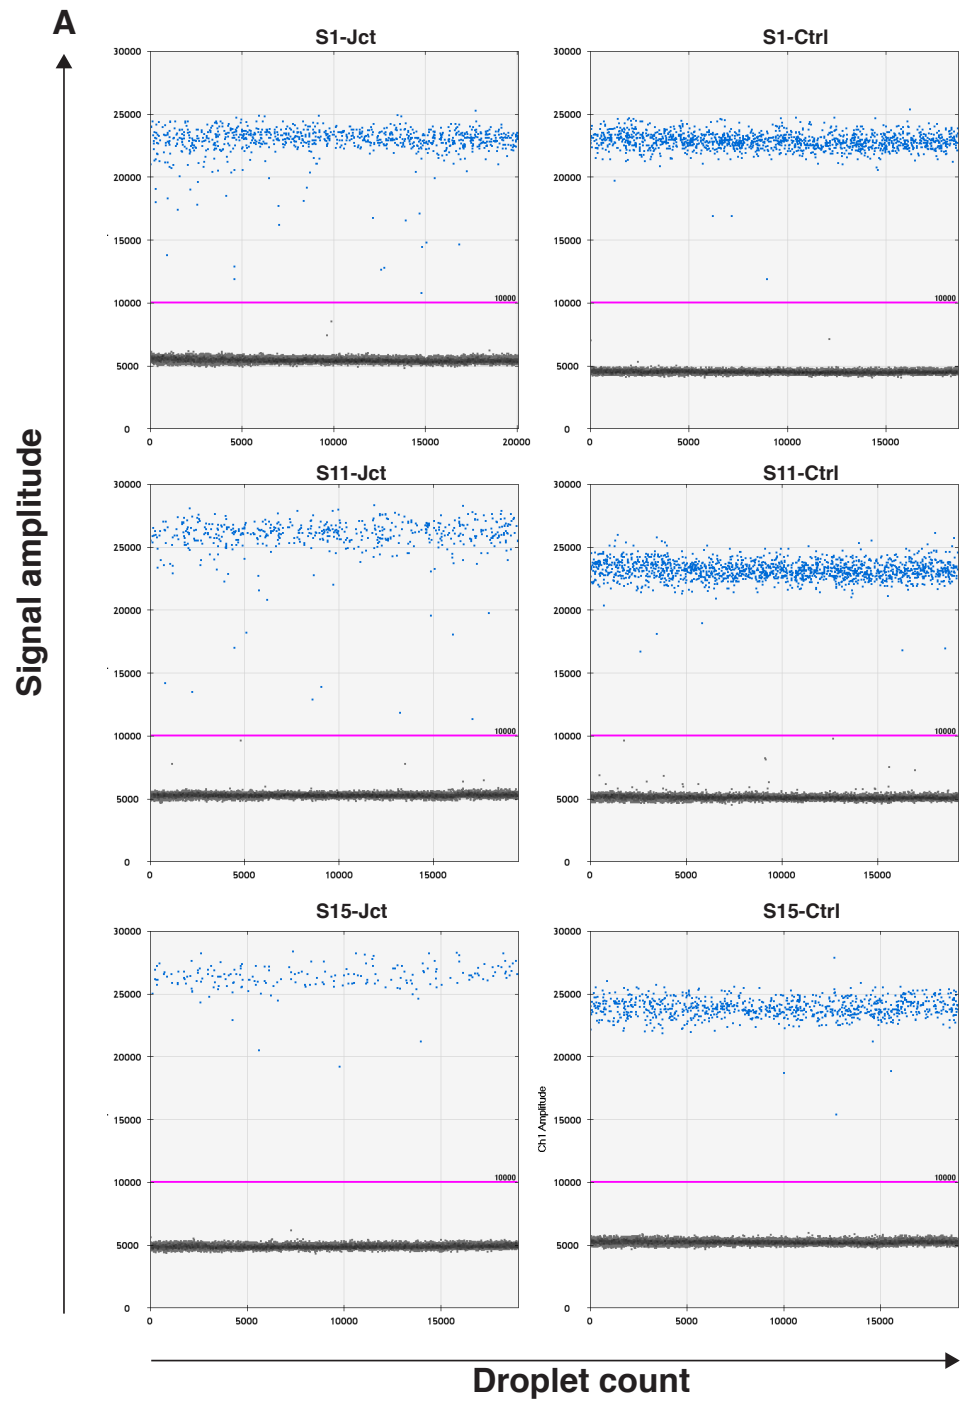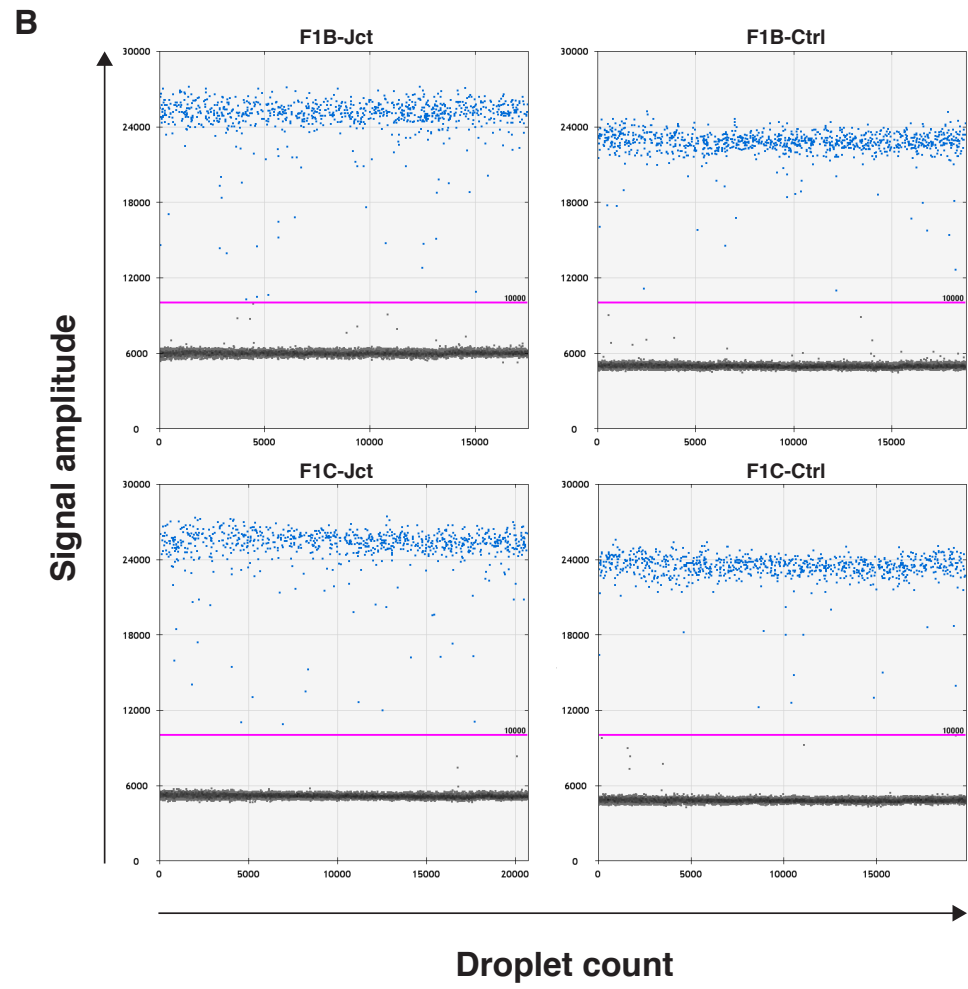

Supplement: NIHMS785695-supplement-07.pdf [file NIHMS785695-supplement-07.pdf]

# Figure S6

## A

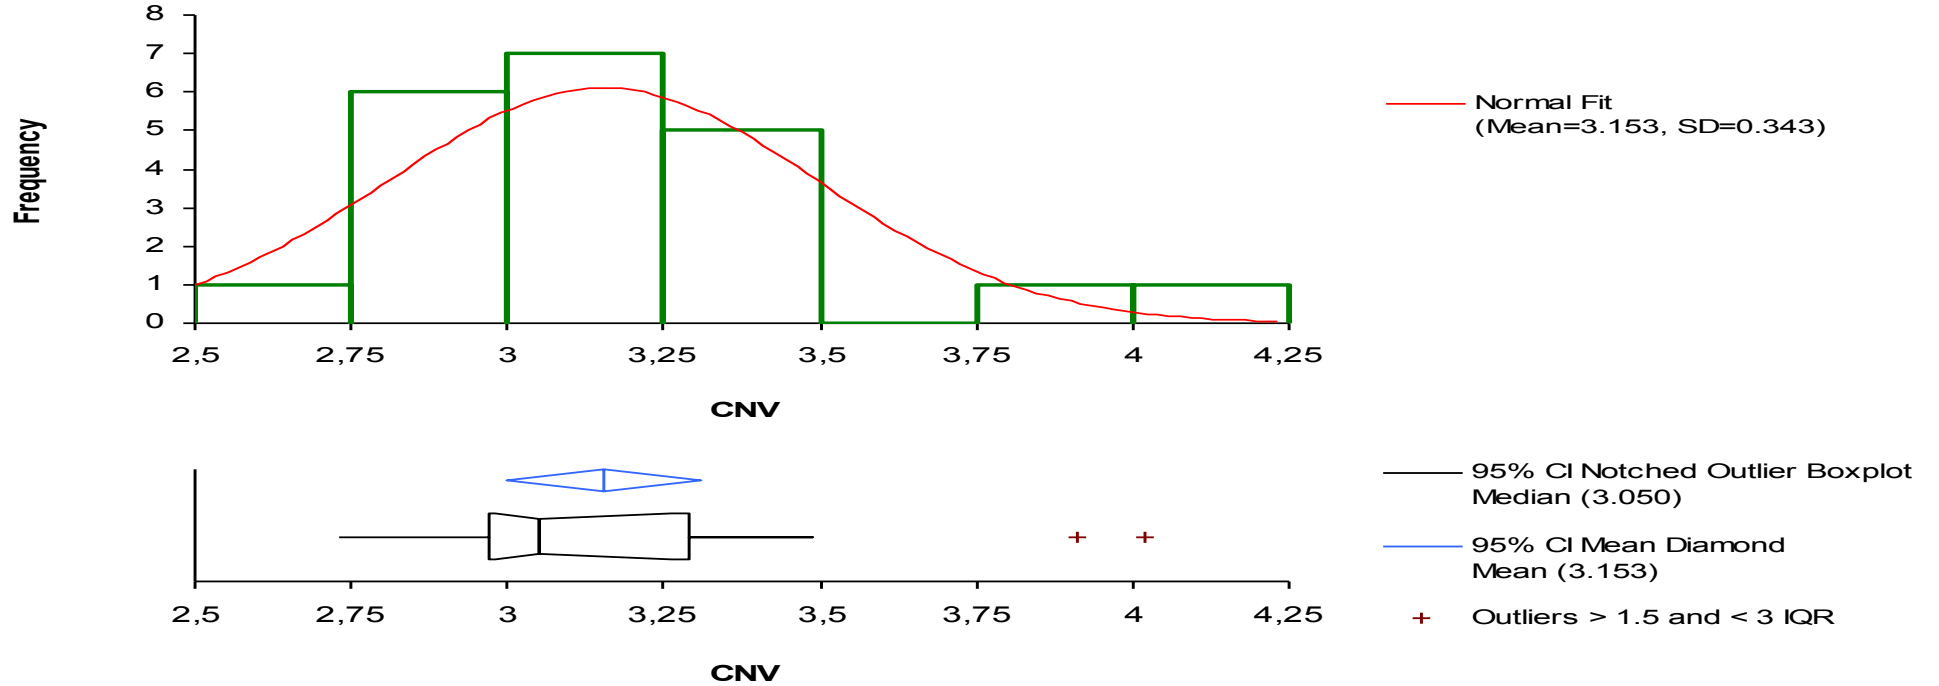

## B

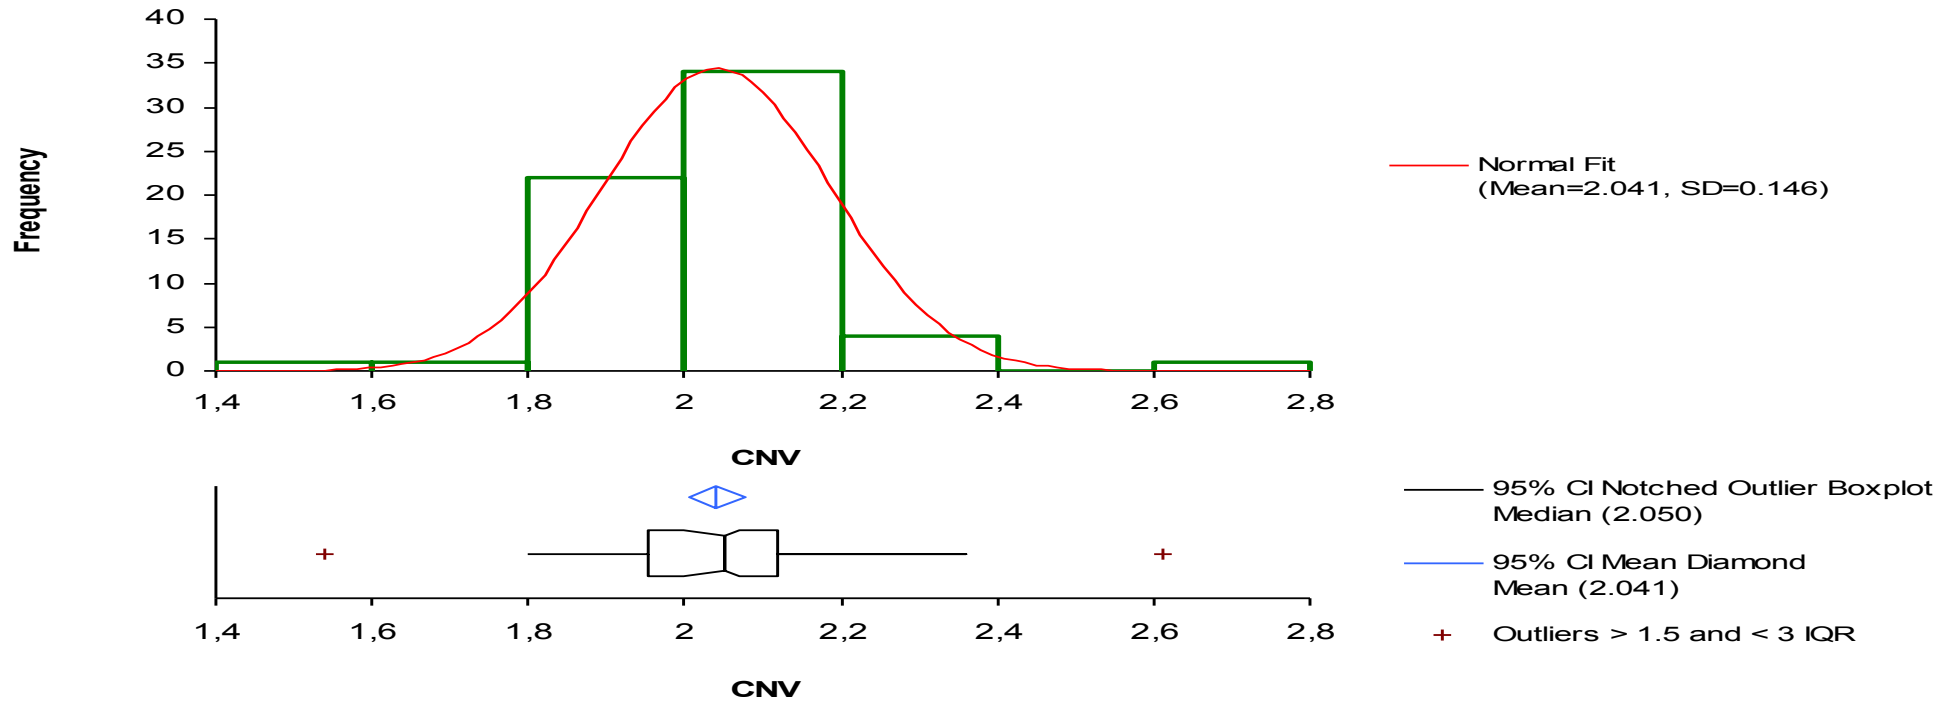

Supplement: NIHMS785695-supplement-08.pdf [file NIHMS785695-supplement-08.pdf]
